# Supplementary material
Source: ML conference proceedings conference paper supplement (https://openaccess.thecvf.com/content/CVPR2022/html/Chikontwe_CAD_Co-Adapting_Discriminative_CVPR_2022_paper.html)

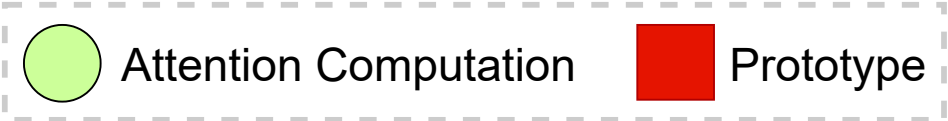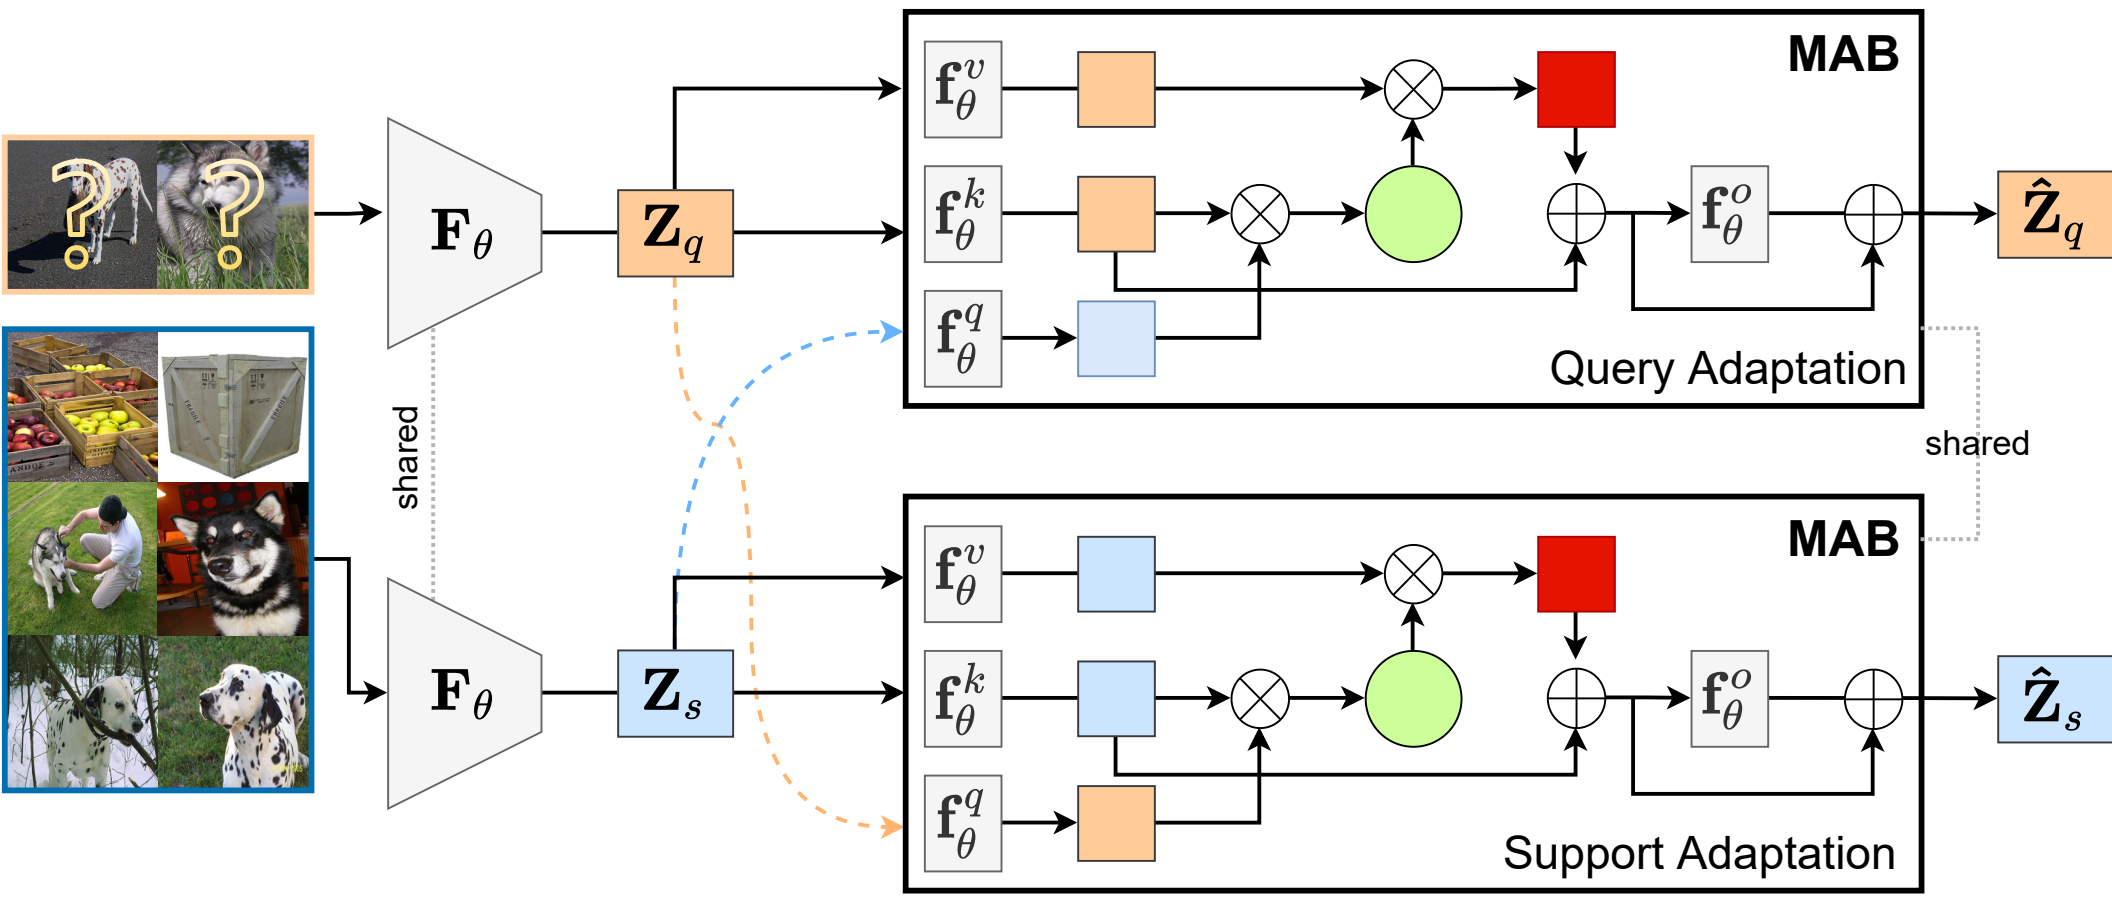

Supplement: Supplementary file 1 [file fig2.pdf › 9521/fig/fig2.pdf]

(a)

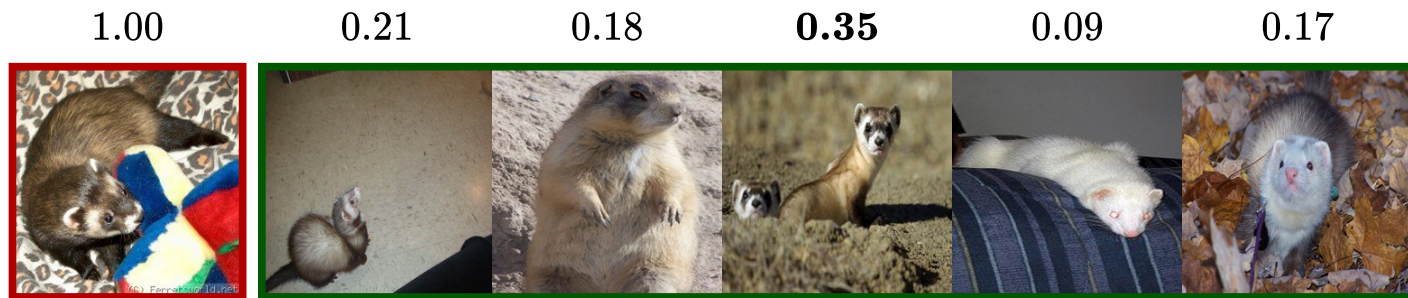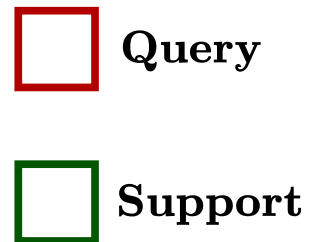

(b)

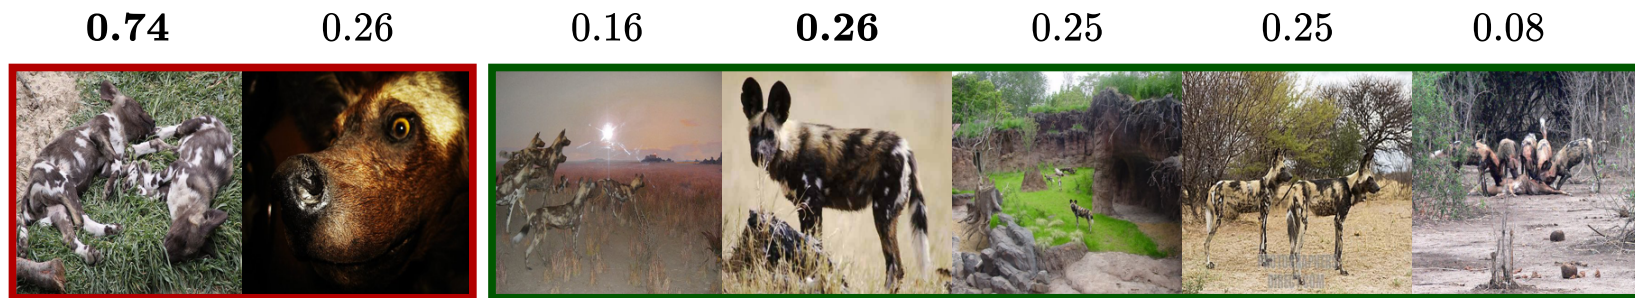

(c)

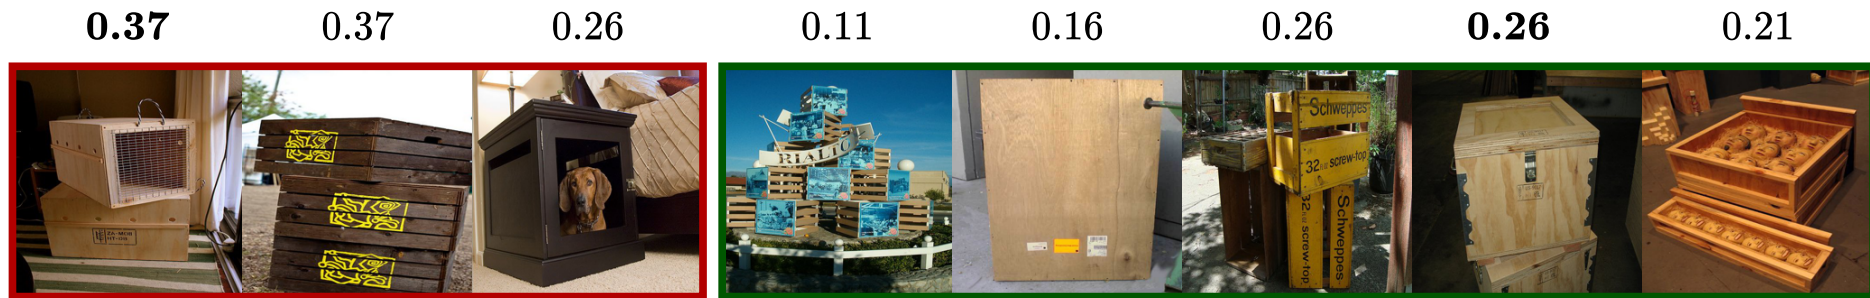

Supplement: Supplementary file 2 [file quality2.pdf › 9521/fig/quality2.pdf]

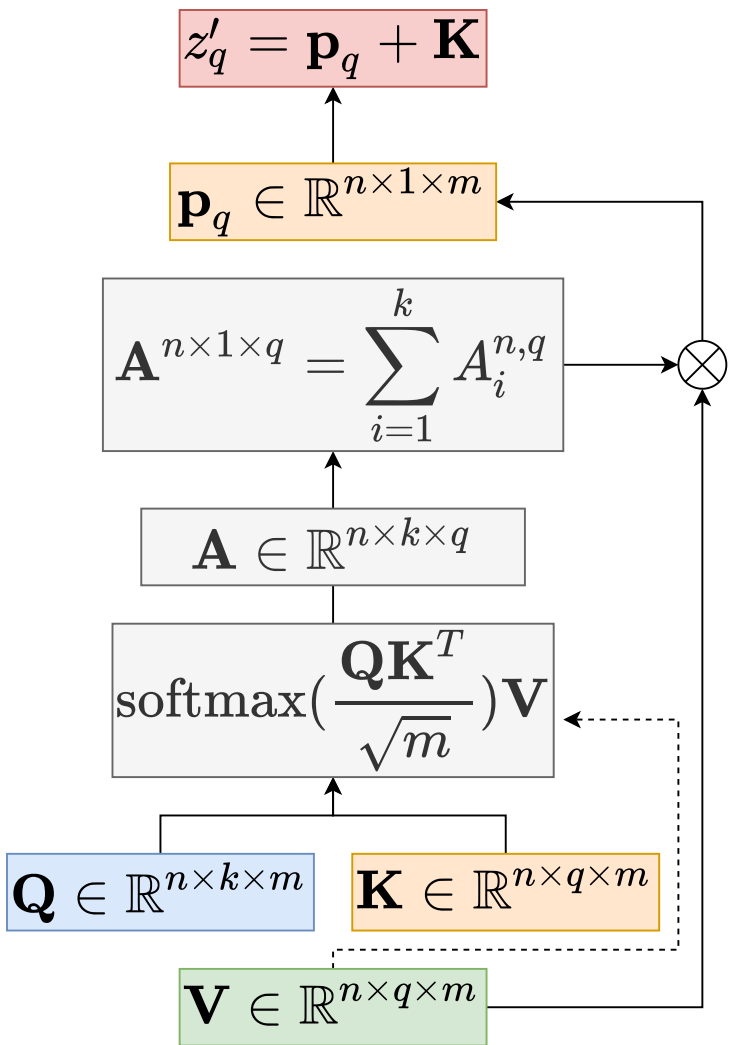

(a)

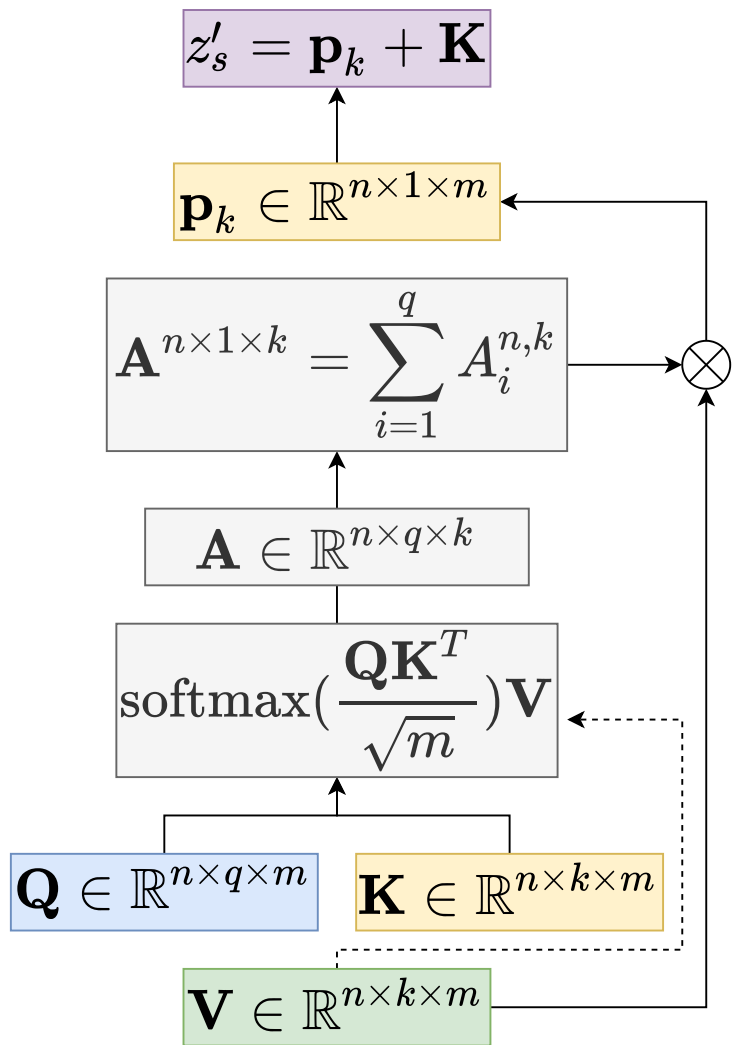

(b)

Supplement: Supplementary file 3 [file selfatt_fig.pdf › 9521/fig/selfatt_fig.pdf]

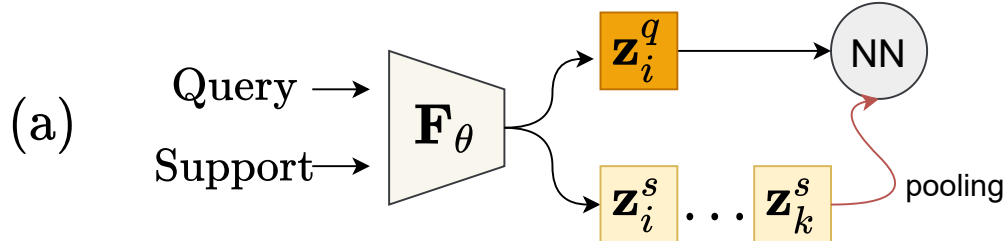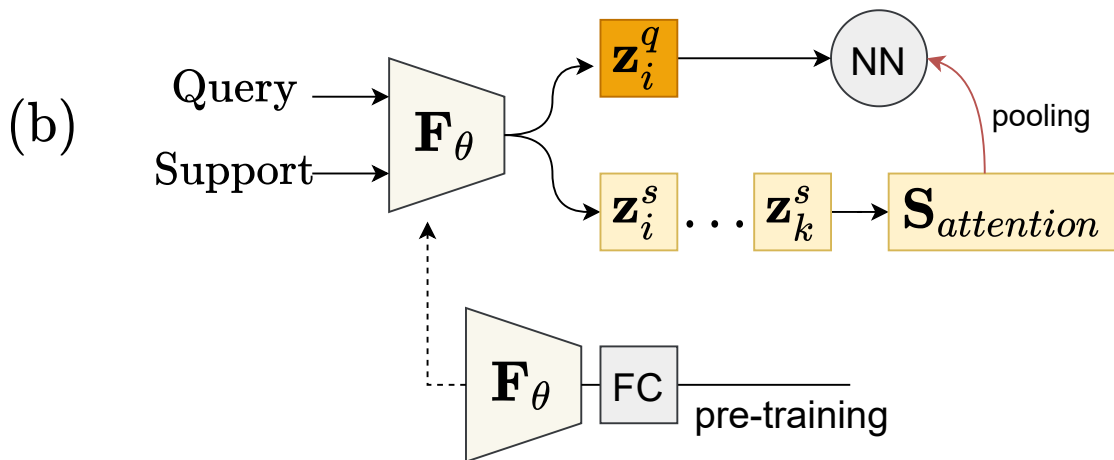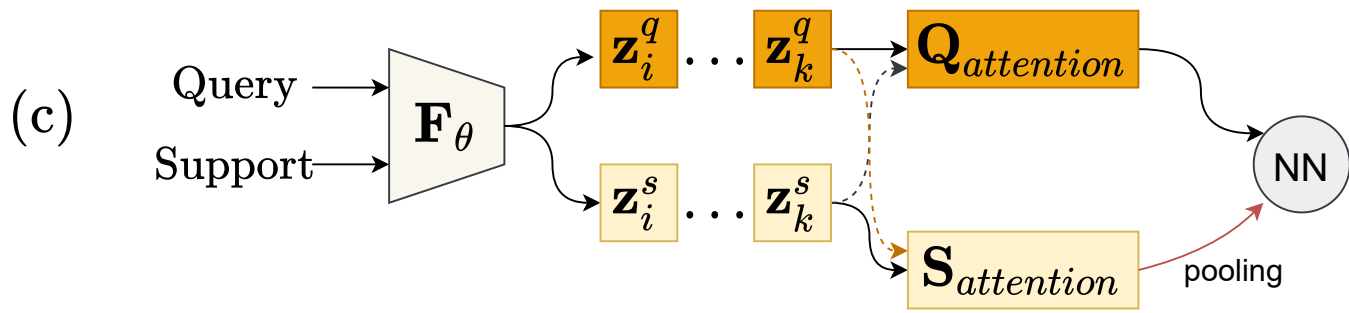

Supplement: Supplementary file 4 [file teaser_fig.pdf › 9521/fig/teaser_fig.pdf]
